# Supplementary material for: NCoR1 controls Mycobacterium tuberculosis growth in myeloid cells by regulating the AMPK-mTOR-TFEB axis
Source: PubMed Central journal article supplement (PMC10465006; doi:10.1371/journal.pbio.3002231), 2023-08-17

# Main Figure Western Blot Raw Images - 1

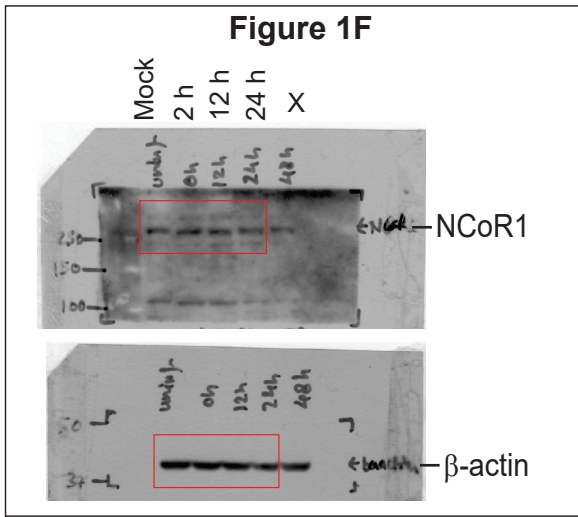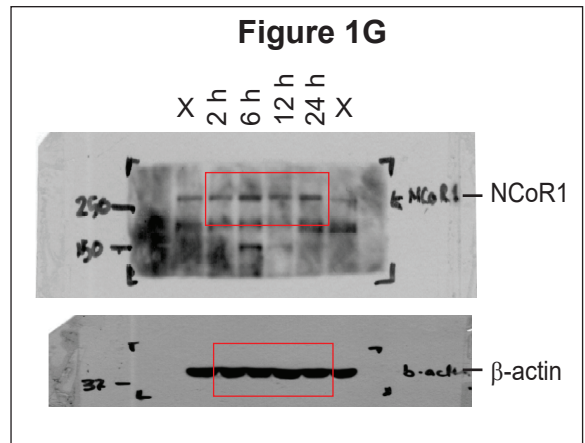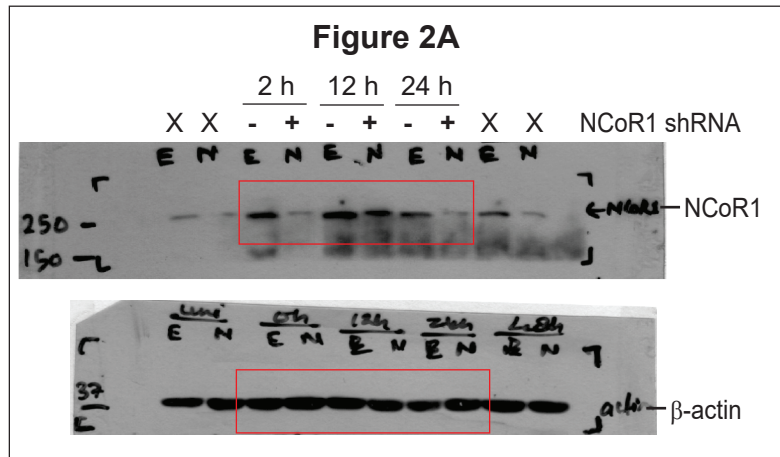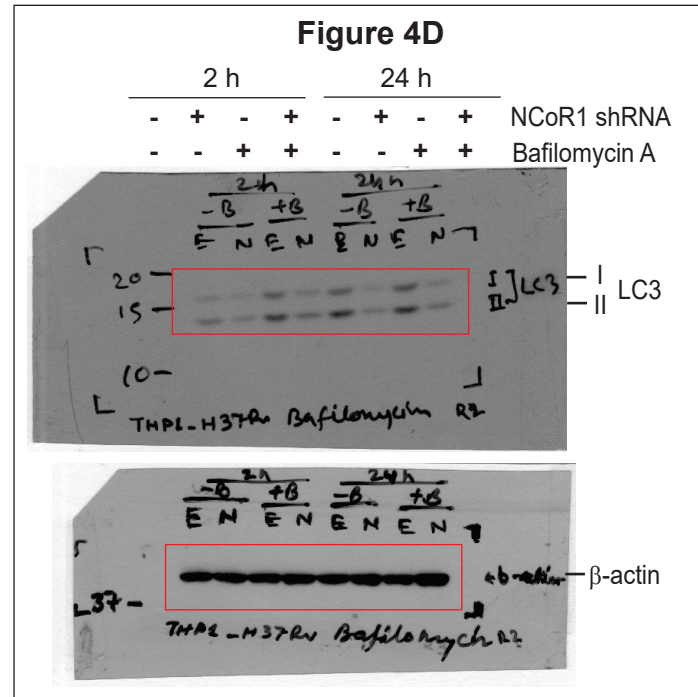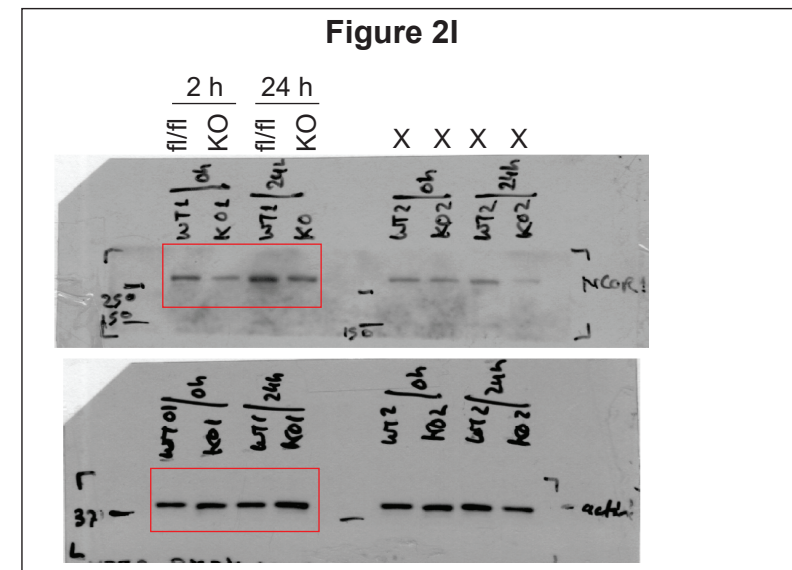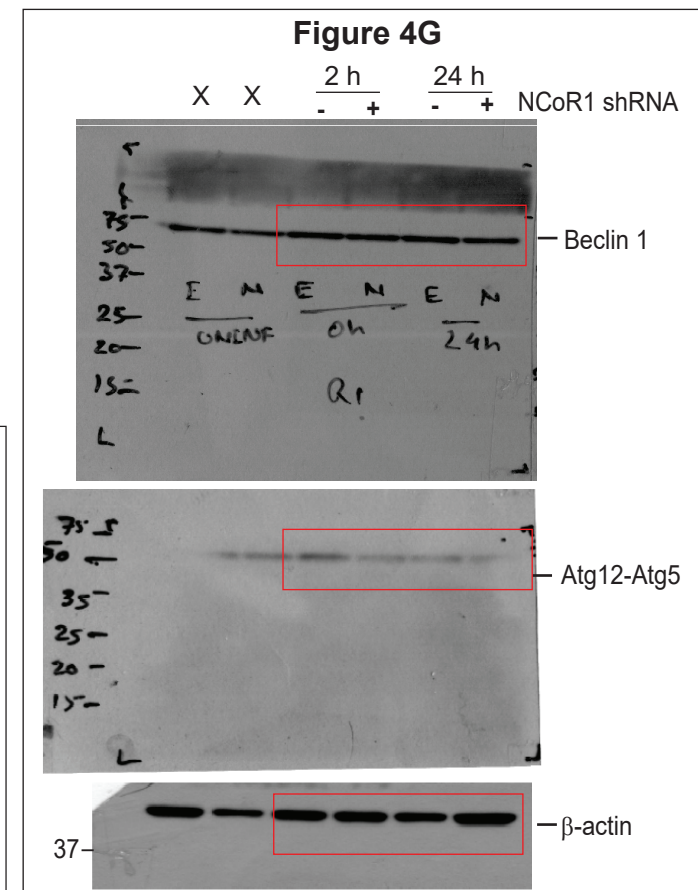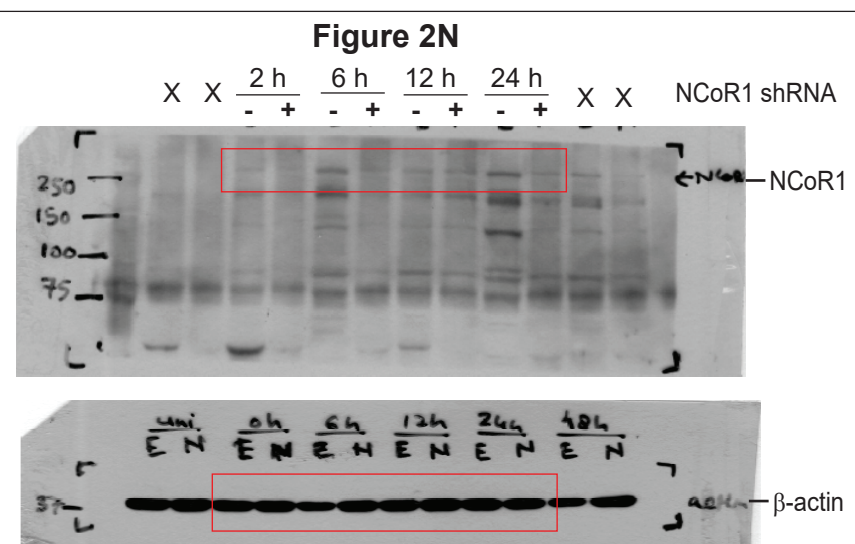

# Main Figure Western Blot Raw Images - 2

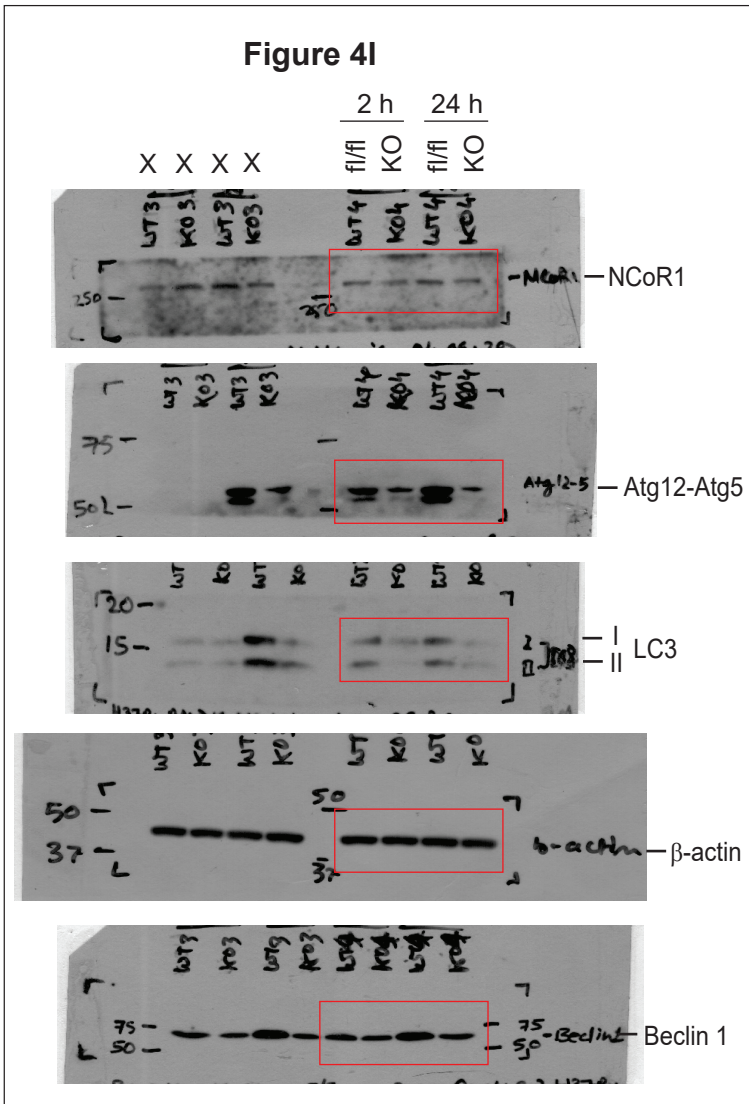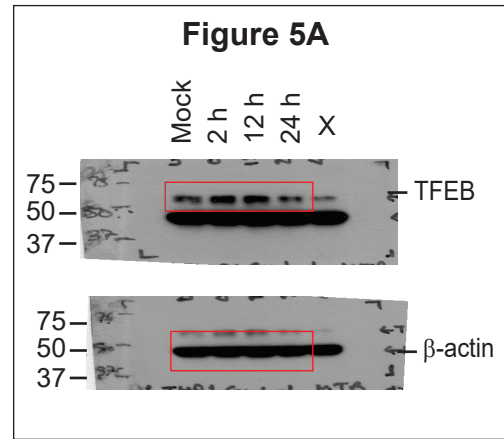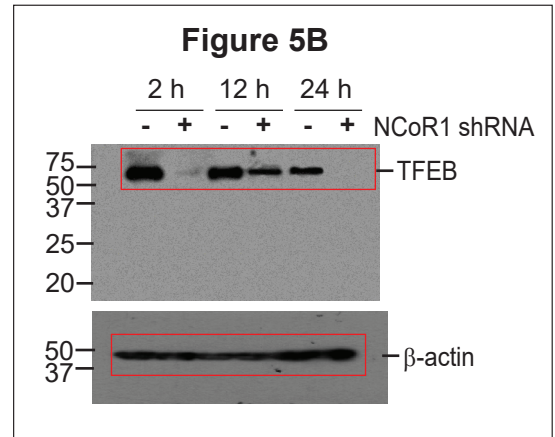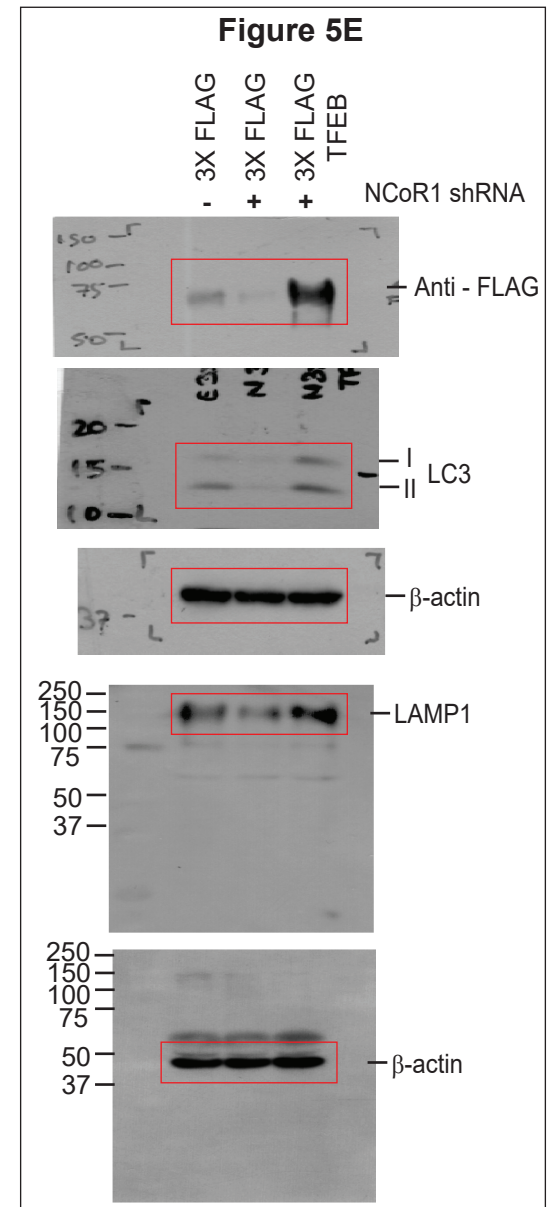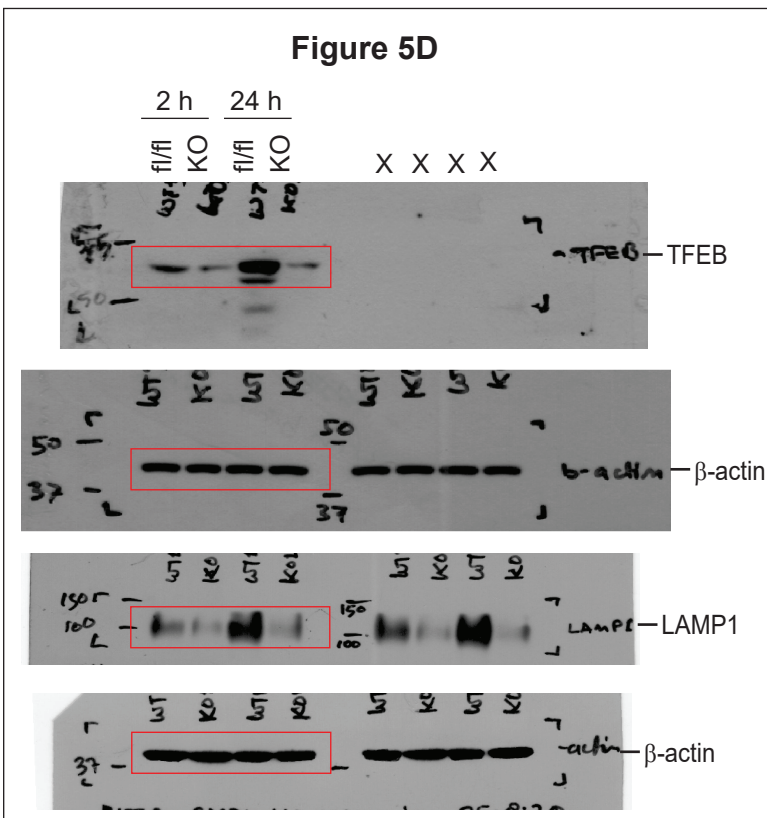



# Main Figure Western Blot Raw Images - 3

## Figure 5H

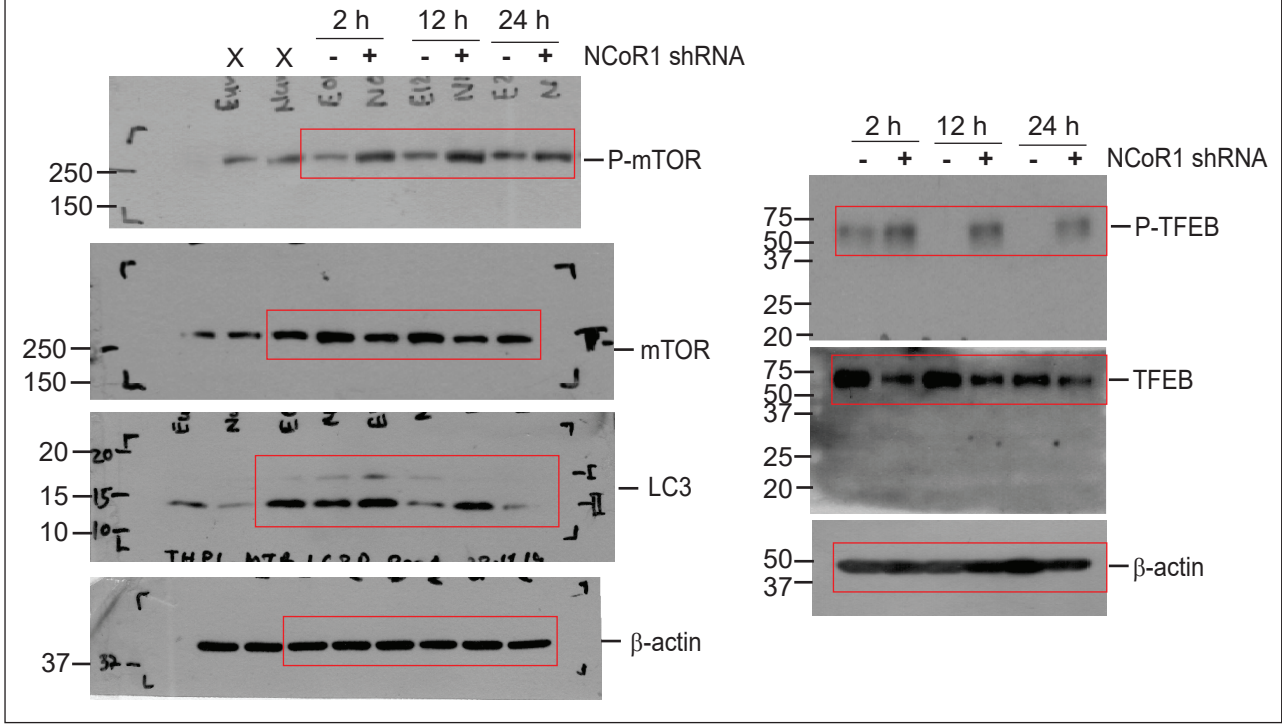

## Figure 5J

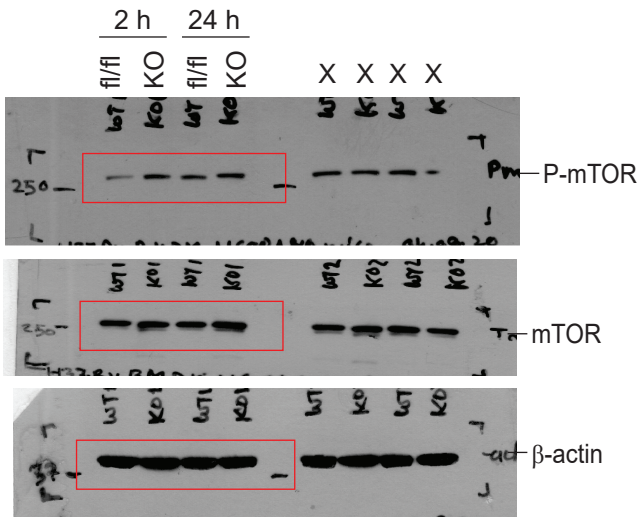

## Figure 5L

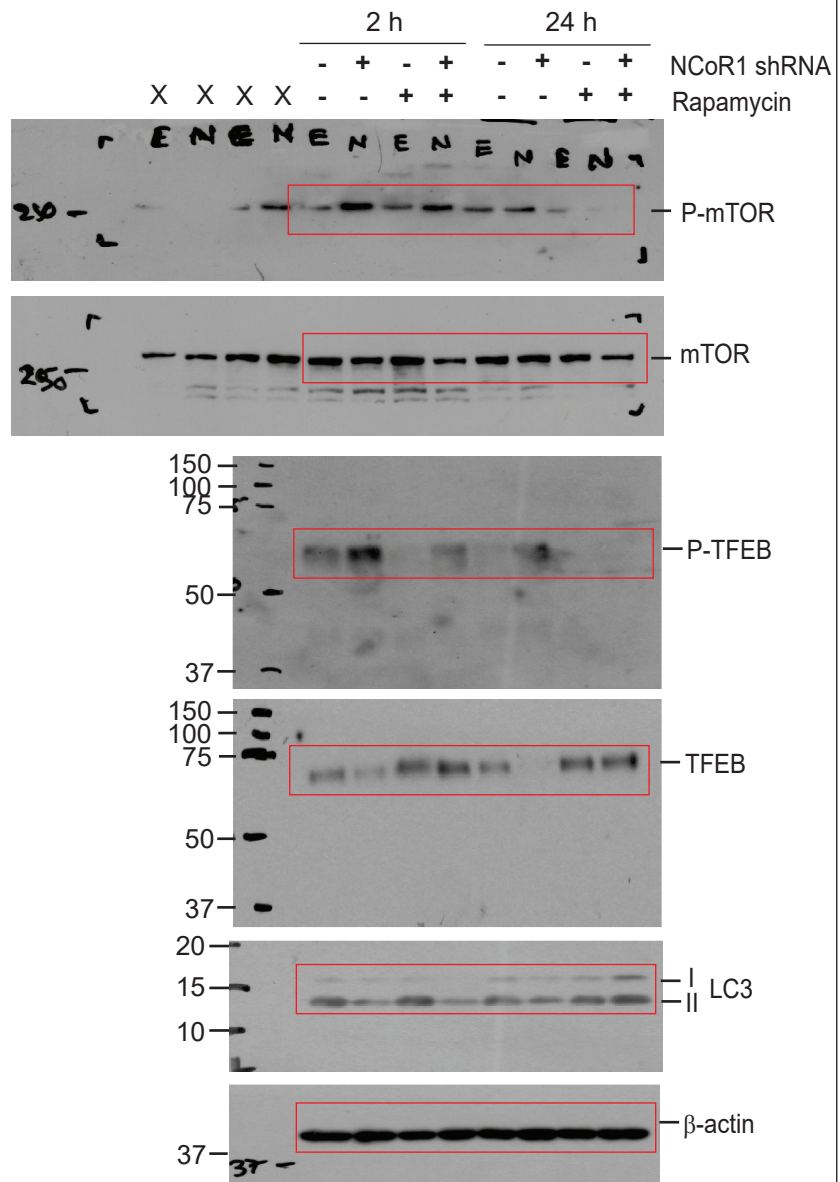

# Main Figure Western Blot Raw Images - 4

## Figure 6B

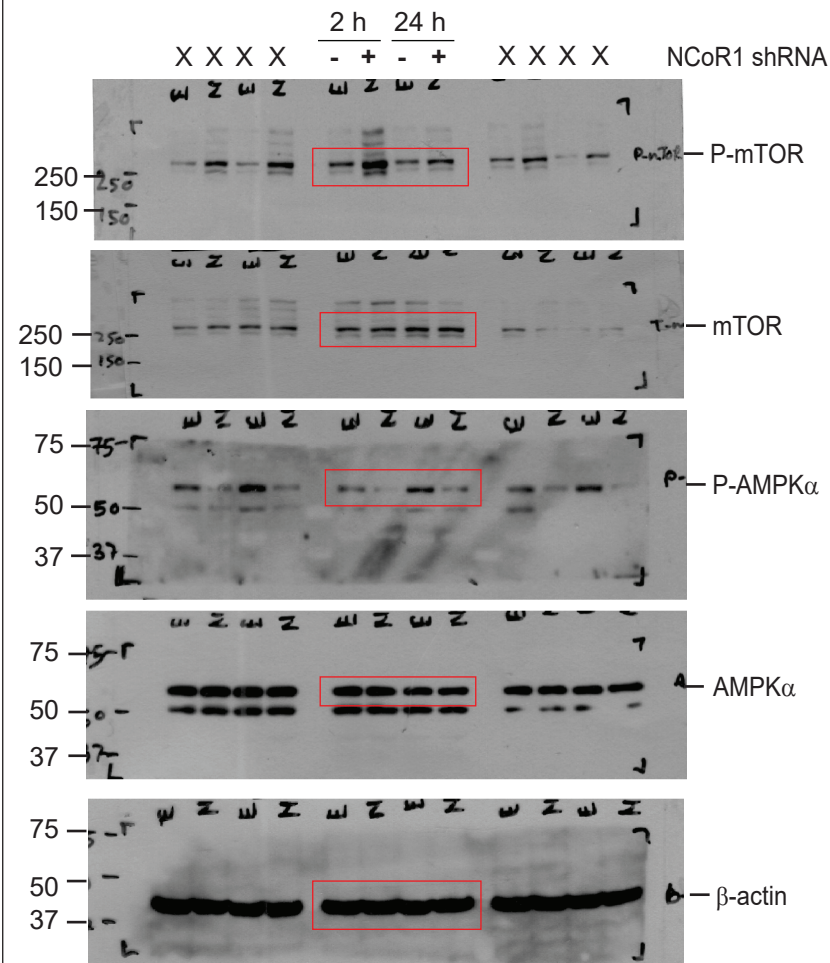

## Figure 6K

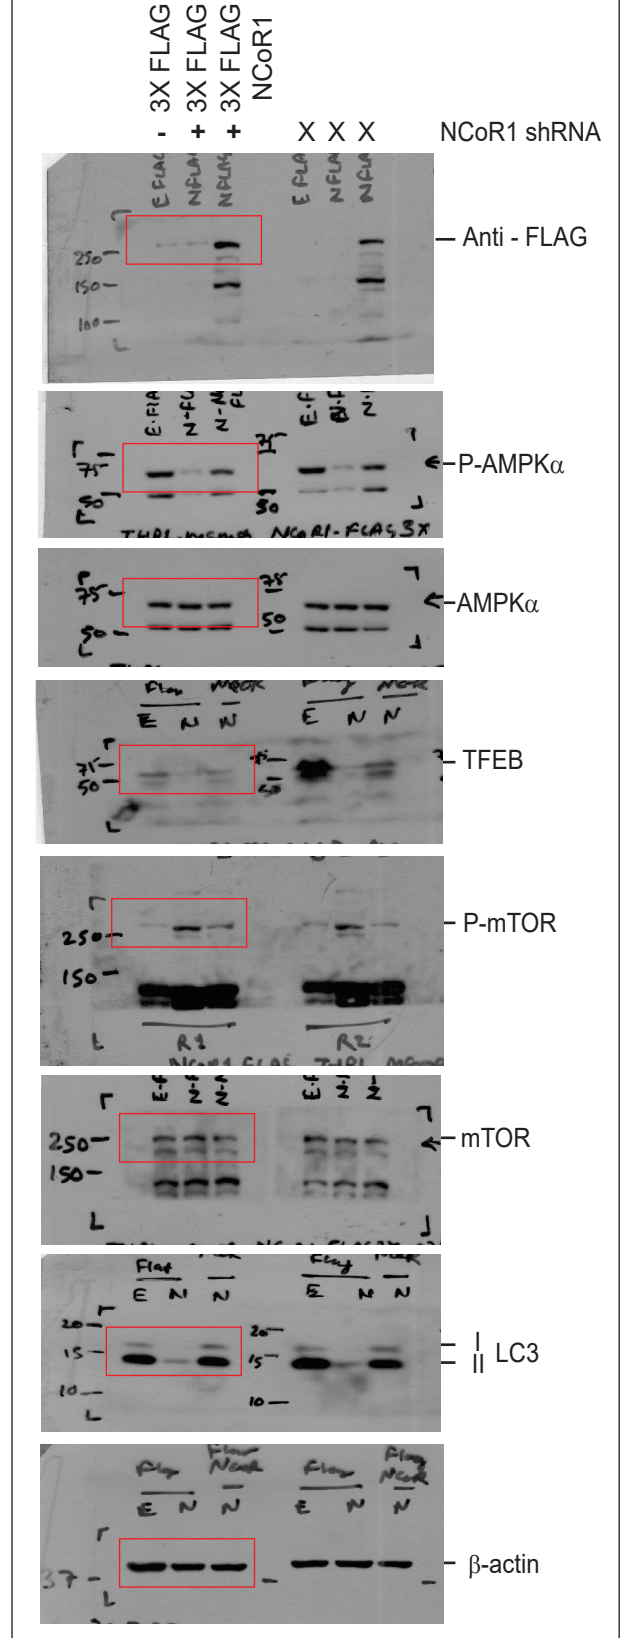

## Figure 6H

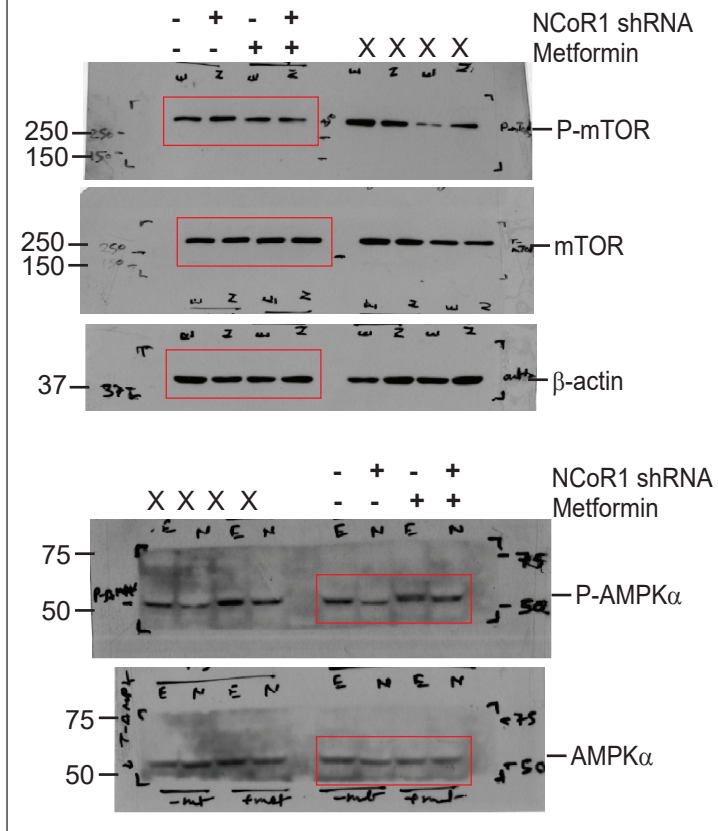



# Supplementary Figure Western Blot Raw Images - 1

## Supplementary Fig 4D

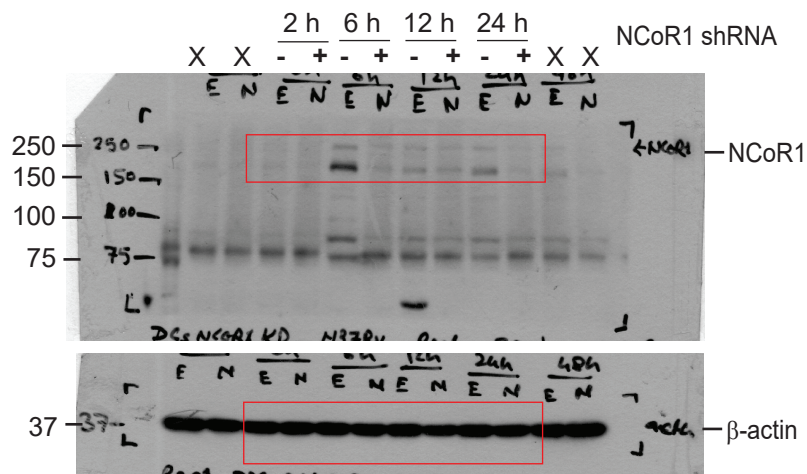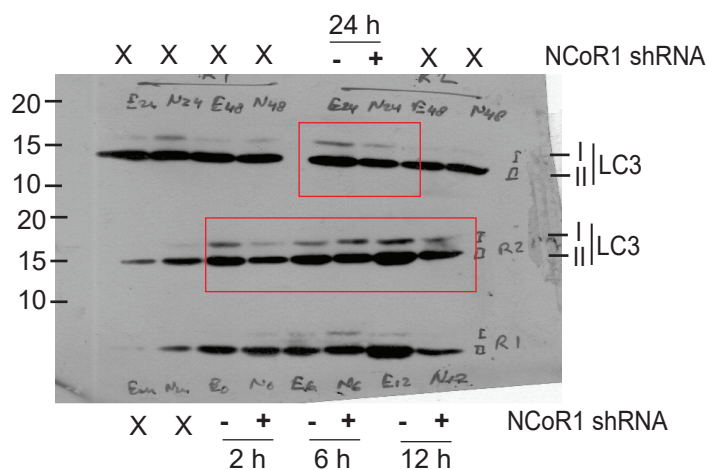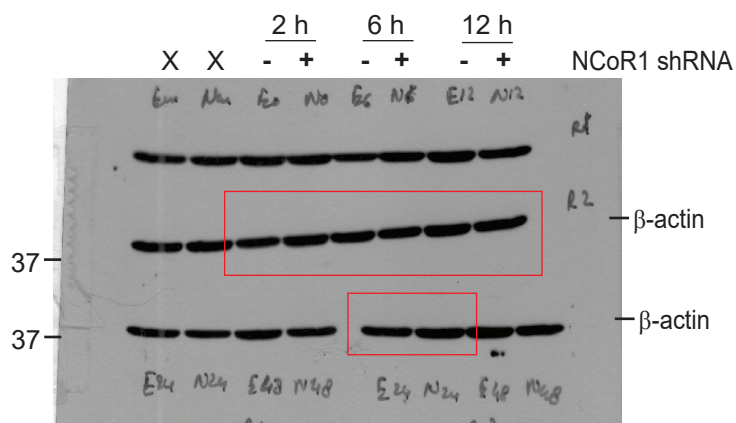

- + X X NCoR1 shRNA  
24 h

## Supplementary Fig 4F

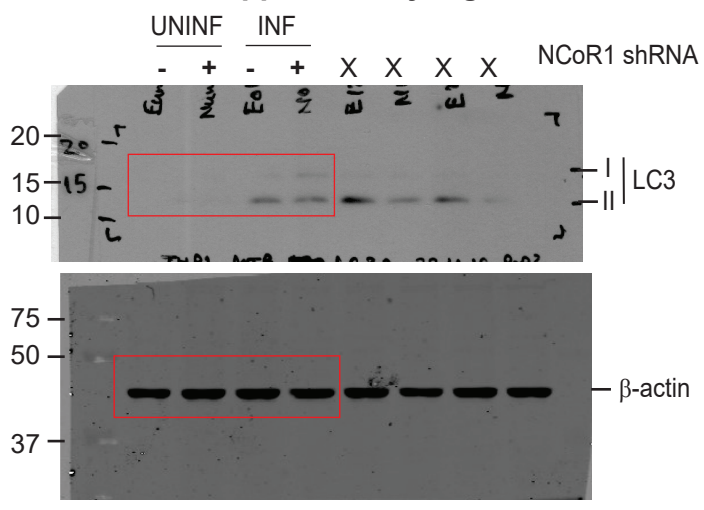

## Supplementary Fig 5A

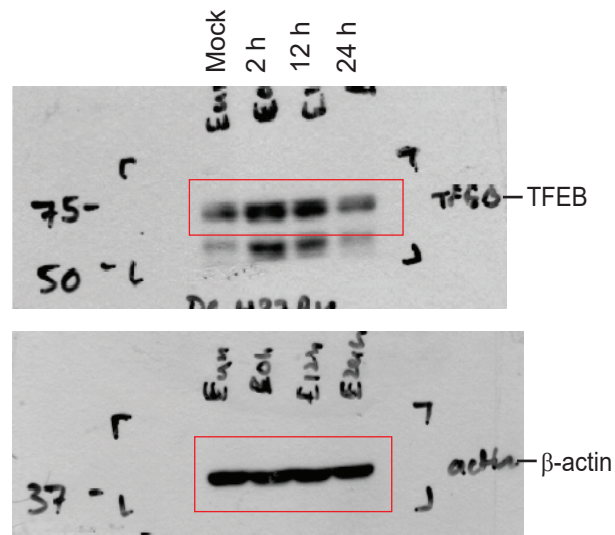

## Supplementary Fig 5E

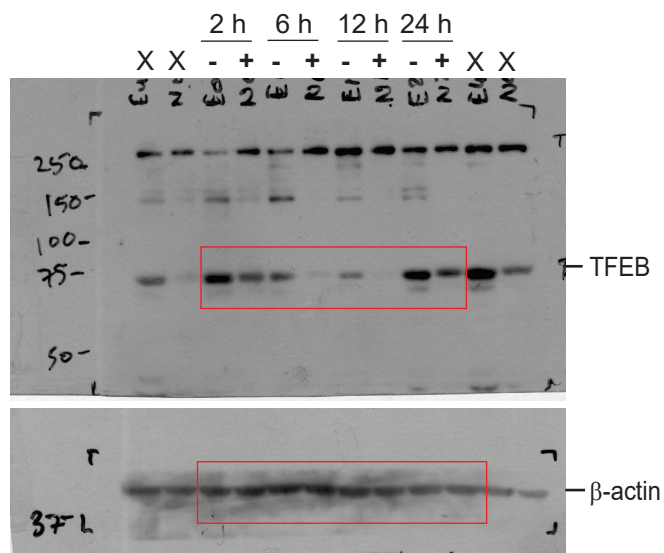

## Supplementary Fig 5M

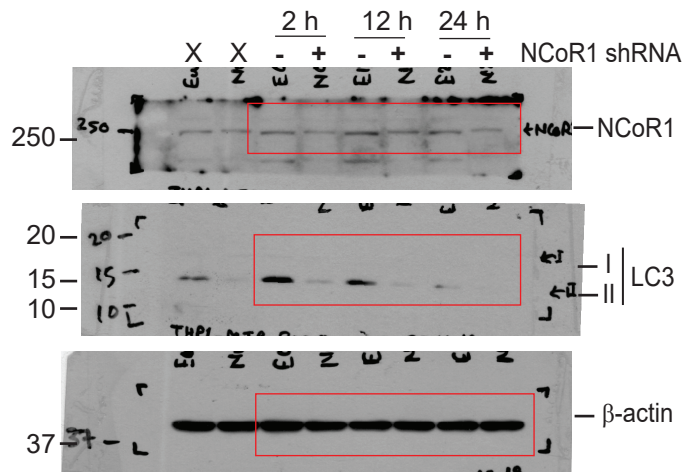

# Supplementary Figure Western Blot Raw Images - 2

## Supplementary Fig 5K

6 h  
 - + - + NCo1 shRNA  
 X X X X - - + + Starvation

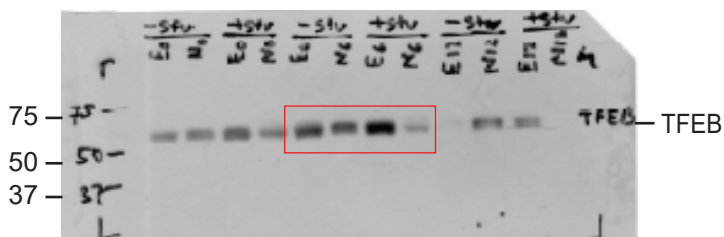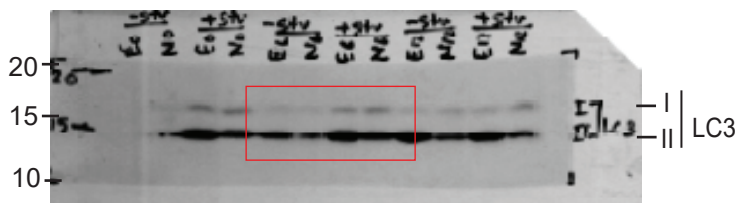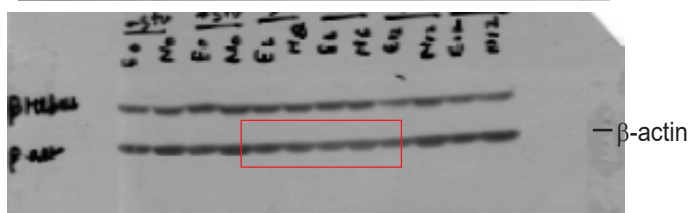

6 h  
 - + - + NCo1 shRNA  
 X X X X - - + + Starvation

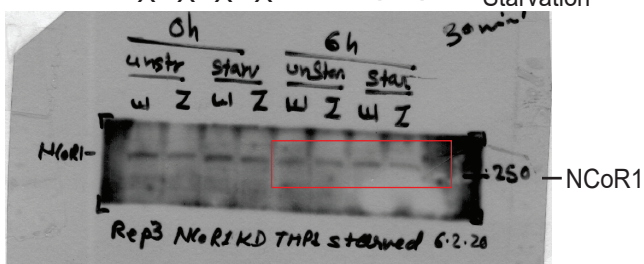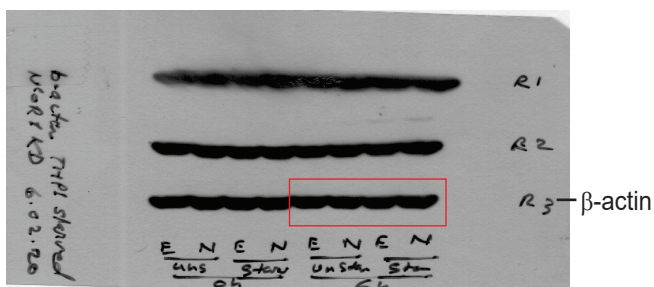

## Supplementary Fig 5O

2 h 24 h  
 - + - + - + - + NCo1 shRNA  
 - - + + - - + + Torin 1

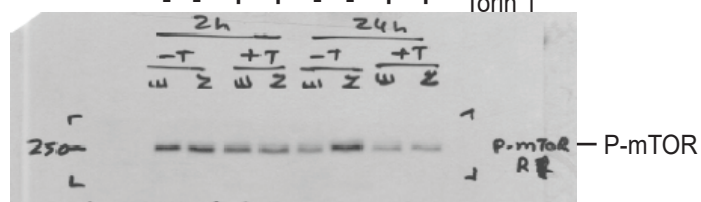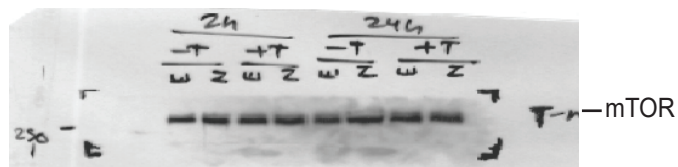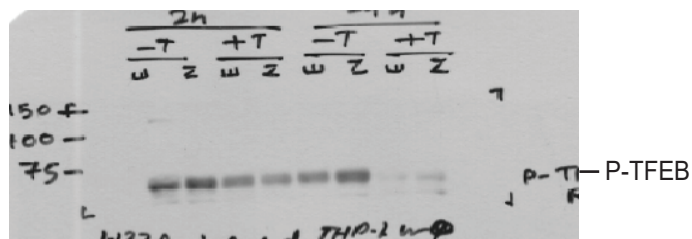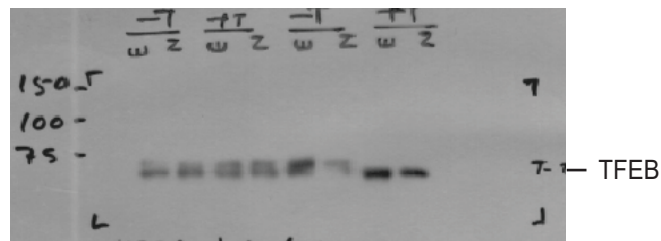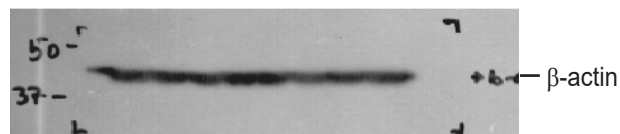

## Supplementary Fig 6H

6 h  
 - + - + NCo1 shRNA  
 X X X X - - + + Antimycin A

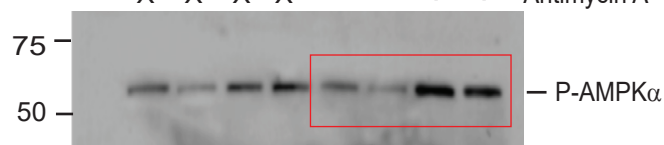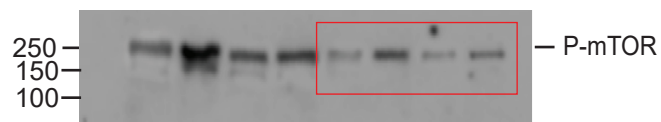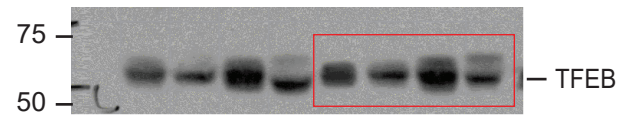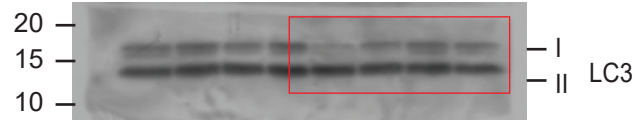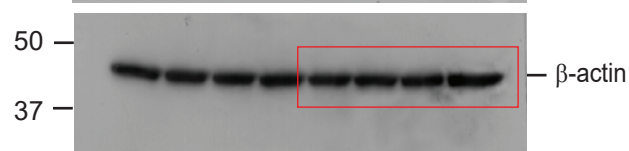

Supplement: pbio.3002231.s006.pdf [file pbio.3002231.s006.pdf]
