# Supplementary material for: NCoR1 controls Mycobacterium tuberculosis growth in myeloid cells by regulating the AMPK-mTOR-TFEB axis
Source: PubMed Central journal article supplement (PMC10465006; doi:10.1371/journal.pbio.3002231), 2023-08-17
Supplement: pbio.3002231.s013.pdf [file pbio.3002231.s013.pdf]

### Control Myeloid Cells

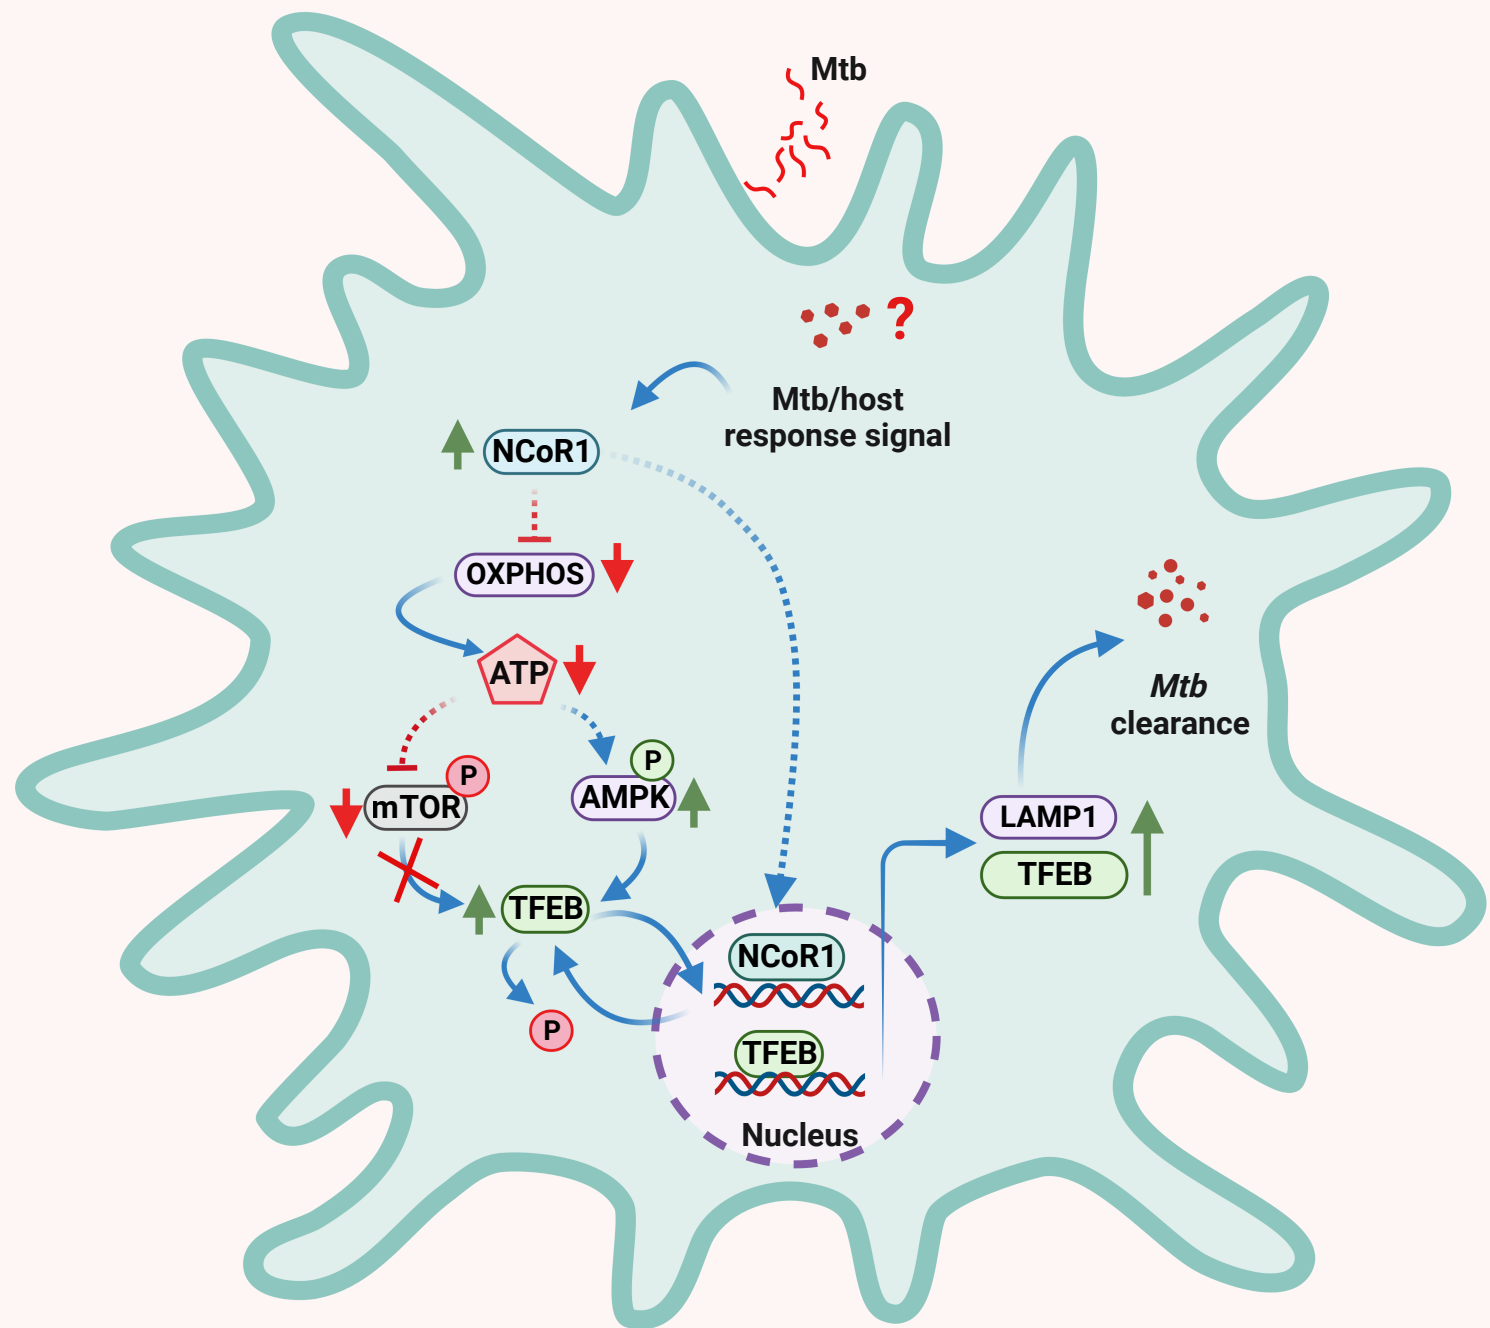

### NCoR1 Depleted Myeloid Cells

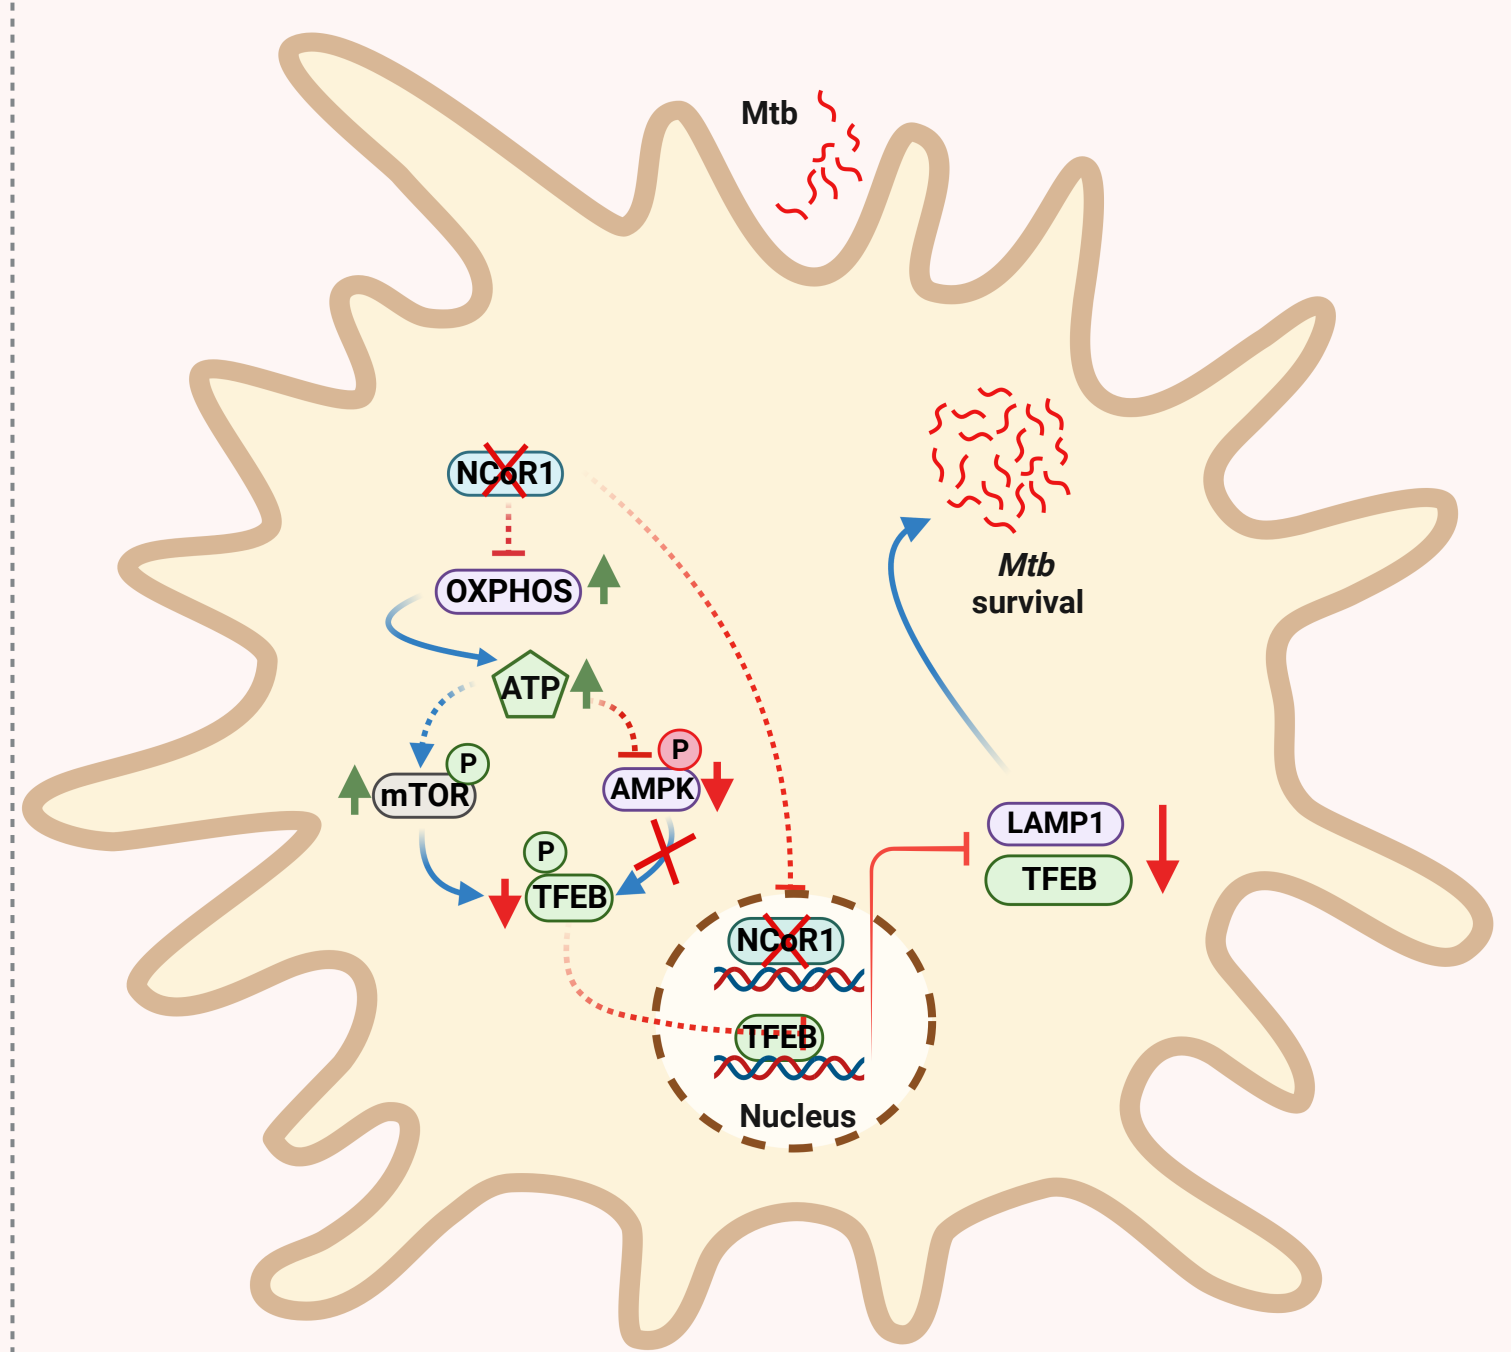

..... indirect control and inhibition    
 ..... indirect control and activation    
 — direct control and inhibition    
 — direct control and activation
